# Supplementary material for: Survey of Barbell Trajectory and Kinematics of the Snatch Lift from the 2015 World and 2017 Pan-American Weightlifting Championships
Source: MDPI journal article supplement (doi:10.3390/sports8090118), 2020-08-25
Supplement: s1 [file s1]

**Table S4.** Load and kinematic variables for heaviest successful snatch attempt for A session lifters at 2017 Pan-American Weightlifting Championship.

| Category | Load<br>(kg) | V <sub>max</sub><br>(m·s <sup>-1</sup> ) | Y <sub>max</sub><br>(m) | Y <sub>catch</sub><br>(m) | Y <sub>drop</sub><br>(m) | Catch <sub>rel</sub><br>(%) | θ <sub>1</sub><br>(°) | X <sub>1</sub><br>(m) | X <sub>2</sub><br>(m) | X <sub>loop</sub><br>(m) | X <sub>net</sub><br>(m) |
|----------|--------------|------------------------------------------|-------------------------|---------------------------|--------------------------|-----------------------------|-----------------------|-----------------------|-----------------------|--------------------------|-------------------------|
| Women    |              |                                          |                         |                           |                          |                             |                       |                       |                       |                          |                         |
| 48       | 68 ± 10      | 1.78 ± 0.10                              | 0.92 ± 0.03             | 0.77 ± 0.05               | 0.16 ± 0.03              | 83 ± 3                      | 8 ± 2                 | 0.06 ± 0.01           | 0.05 ± 0.02           | 0.09 ± 0.03              | 0.10 ± 0.04             |
| 53       | 83 ± 3       | 1.77 ± 0.09                              | 0.93 ± 0.05             | 0.76 ± 0.06               | 0.17 ± 0.03              | 81 ± 4                      | 8 ± 2                 | 0.08 ± 0.02           | 0.04 ± 0.02           | 0.12 ± 0.04              | 0.16 ± 0.06             |
| 58       | 89 ± 5       | 1.89 ± 0.08                              | 0.99 ± 0.02             | 0.81 ± 0.03               | 0.18 ± 0.04              | 82 ± 4                      | 5 ± 2                 | 0.05 ± 0.02           | 0.05 ± 0.01           | 0.10 ± 0.02              | 0.09 ± 0.04             |
| 63       | 89 ± 5       | 1.88 ± 0.08                              | 1.00 ± 0.04             | 0.86 ± 0.05               | 0.14 ± 0.03              | 86 ± 3                      | 7 ± 2                 | 0.06 ± 0.01           | 0.05 ± 0.03           | 0.13 ± 0.06              | 0.14 ± 0.09             |
| 69       | 93 ± 9       | 1.94 ± 0.10                              | 1.05 ± 0.04             | 0.86 ± 0.04               | 0.19 ± 0.04              | 82 ± 3                      | 5 ± 3                 | 0.05 ± 0.03           | 0.07 ± 0.03           | 0.10 ± 0.04              | 0.08 ± 0.10             |
| 75       | 99 ± 6       | 1.85 ± 0.06                              | 1.05 ± 0.04             | 0.87 ± 0.07               | 0.17 ± 0.04              | 83 ± 4                      | 0 ± 18                | 0.05 ± 0.03           | 0.07 ± 0.03           | 0.11 ± 0.04              | 0.09 ± 0.08             |
| 90       | 101 ± 13     | 1.83 ± 0.08                              | 1.04 ± 0.03             | 0.89 ± 0.04               | 0.15 ± 0.04              | 86 ± 4                      | 6 ± 5                 | 0.06 ± 0.05           | 0.07 ± 0.02           | 0.12 ± 0.04              | 0.11 ± 0.10             |
| +90      | 99 ± 22      | 1.99 ± 0.12                              | 1.12 ± 0.07             | 0.98 ± 0.09               | 0.14 ± 0.04              | 87 ± 4                      | 8 ± 4                 | 0.08 ± 0.04           | 0.08 ± 0.03           | 0.13 ± 0.05              | 0.13 ± 0.10             |
|          | 90 ± 15      | 1.86 ± 0.11                              | 1.01 ± 0.07             | 0.85 ± 0.09               | 0.16 ± 0.04              | 84 ± 4                      | 6 ± 7                 | 0.06 ± 0.03           | 0.06 ± 0.03           | 0.11 ± 0.04              | 0.11 ± 0.08             |
| Men      |              |                                          |                         |                           |                          |                             |                       |                       |                       |                          |                         |
| 56       | 102 ± 10     | 1.77 ± 0.11                              | 0.95 ± 0.07             | 0.81 ± 0.05               | 0.14 ± 0.04              | 85 ± 3                      | 6 ± 3                 | 0.05 ± 0.03           | 0.04 ± 0.03           | 0.11 ± 0.04              | 0.11 ± 0.09             |
| 62       | 113 ± 11     | 1.84 ± 0.16                              | 0.97 ± 0.06             | 0.82 ± 0.07               | 0.14 ± 0.04              | 85 ± 4                      | 9 ± 3                 | 0.08 ± 0.03           | 0.03 ± 0.02           | 0.12 ± 0.06              | 0.17 ± 0.10             |
| 69       | 120 ± 16     | 1.79 ± 0.10                              | 0.99 ± 0.05             | 0.85 ± 0.05               | 0.14 ± 0.04              | 86 ± 4                      | 7 ± 3                 | 0.07 ± 0.04           | 0.06 ± 0.04           | 0.10 ± 0.05              | 0.11 ± 0.12             |
| 77       | 145 ± 8      | 1.81 ± 0.10                              | 1.02 ± 0.04             | 0.86 ± 0.03               | 0.16 ± 0.03              | 84 ± 3                      | 6 ± 3                 | 0.06 ± 0.04           | 0.03 ± 0.02           | 0.13 ± 0.04              | 0.16 ± 0.09             |
| 85       | 155 ± 5      | 1.78 ± 0.12                              | 1.03 ± 0.04             | 0.89 ± 0.06               | 0.14 ± 0.04              | 86 ± 4                      | 5 ± 2                 | 0.05 ± 0.02           | 0.04 ± 0.02           | 0.13 ± 0.04              | 0.15 ± 0.06             |
| 94       | 153 ± 12     | 1.85 ± 0.09                              | 1.08 ± 0.06             | 0.91 ± 0.05               | 0.17 ± 0.05              | 84 ± 4                      | 5 ± 3                 | 0.05 ± 0.03           | 0.05 ± 0.03           | 0.11 ± 0.05              | 0.11 ± 0.10             |
| 105      | 163 ± 11     | 1.84 ± 0.15                              | 1.12 ± 0.06             | 0.97 ± 0.08               | 0.15 ± 0.03              | 86 ± 3                      | 4 ± 4                 | 0.04 ± 0.04           | 0.07 ± 0.02           | 0.09 ± 0.05              | 0.06 ± 0.10             |
| +105     | 165 ± 11     | 1.96 ± 0.12                              | 1.20 ± 0.07             | 1.05 ± 0.06               | 0.15 ± 0.05              | 87 ± 4                      | 5 ± 3                 | 0.06 ± 0.03           | 0.08 ± 0.02           | 0.11 ± 0.04              | 0.09 ± 0.05             |
|          | 136 ± 25     | 1.83 ± 0.13                              | 1.03 ± 0.09             | 0.88 ± 0.09               | 0.15 ± 0.04              | 85 ± 4                      | 6 ± 3                 | 0.06 ± 0.03           | 0.05 ± 0.03           | 0.11 ± 0.05              | 0.12 ± 0.10             |

Values are mean ± SD.
