# Supplementary material for: Survey of Barbell Trajectory and Kinematics of the Snatch Lift from the 2015 World and 2017 Pan-American Weightlifting Championships
Source: MDPI journal article supplement (doi:10.3390/sports8090118), 2020-08-25
Supplement: s1 [file s1]

**Table S2.** Distribution of barbell trajectory type of each top-three finisher's heaviest successful snatch attempt at 2015 World Weightlifting Championship.

| Category      | Type 1 | Type 2  | Type 3  | Type 4 |
|---------------|--------|---------|---------|--------|
| Women         |        |         |         |        |
| 48            | -      | 2       | 1       | -      |
| 53            | -      | -       | 1       | 2      |
| 58            | -      | 2       | 1       | -      |
| 63            | -      | 2       | 1       | -      |
| 69            | 1      | 2       | -       | -      |
| 75*           | 1      | 1       | -       | -      |
| +75           | -      | 1       | 2       | -      |
|               | 2 (10) | 10 (50) | 6 (30)  | 2 (10) |
| Men           |        |         |         |        |
| 56            | 1      | 1       | 1       | -      |
| 62            | 2      | 1       | -       | -      |
| 69            | 1      | -       | 1       | 1      |
| 77            | -      | 1       | 2       | -      |
| 85            | 1      | 1       | 1       | -      |
| 94            | -      | 1       | 2       | -      |
| 105           | -      | -       | 3       | -      |
| +105          | -      | -       | 3       | -      |
|               | 5 (21) | 5 (21)  | 13 (54) | 1 (4)  |
| Continent     |        |         |         |        |
| North America | -      | -       | -       | -      |
| South America | -      | -       | -       | -      |
| Asia          | 4 (13) | 13 (43) | 11 (37) | 2 (7)  |
| Europe        | 3 (21) | 2 (14)  | 8 (57)  | 1 (7)  |
| Africa        | -      | -       | -       | -      |
| Grand Total   | 7 (16) | 15 (34) | 19 (43) | 3 (7)  |

Values are count (% relative frequency); \* one lift not recorded due to hardware/software error.
