# Supplementary material for: Survey of Barbell Trajectory and Kinematics of the Snatch Lift from the 2015 World and 2017 Pan-American Weightlifting Championships
Source: MDPI journal article supplement (doi:10.3390/sports8090118), 2020-08-25
Supplement: s1 [file s1]

**Table S6.** Load and kinematic variables for heaviest successful snatch attempt for top-three men in each weight category at 2015 World Weightlifting Championship.

| Place | Load | V <sub>max</sub>     | Y <sub>max</sub> | Y <sub>catch</sub> | Y <sub>drop</sub> | Catch <sub>rel</sub> | θ <sub>1</sub> | X <sub>1</sub> | X <sub>2</sub> | X <sub>loop</sub> | X <sub>net</sub> |
|-------|------|----------------------|------------------|--------------------|-------------------|----------------------|----------------|----------------|----------------|-------------------|------------------|
|       | (kg) | (m·s <sup>-1</sup> ) | (m)              | (m)                | (m)               | (%)                  | (°)            | (m)            | (m)            | (m)               | (m)              |
| 56    |      |                      |                  |                    |                   |                      |                |                |                |                   |                  |
| 1     | 139  | 1.67                 | 0.93             | 0.73               | 0.20              | 78                   | 11             | 0.07           | 0.07           | 0.06              | 0.06             |
| 2     | 132  | 1.87                 | 0.85             | 0.76               | 0.09              | 89                   | 2              | 0.01           | 0.03           | 0.05              | 0.03             |
| 3     | 131  | 1.62                 | 0.82             | 0.67               | 0.15              | 82                   | 8              | 0.05           | 0.05           | 0.07              | 0.06             |
| 62    |      |                      |                  |                    |                   |                      |                |                |                |                   |                  |
| 1     | 151  | 1.68                 | 0.91             | 0.72               | 0.19              | 79                   | 5              | 0.04           | 0.07           | 0.01              | -0.02            |
| 2     | 150  | 1.87                 | 0.93             | 0.76               | 0.17              | 82                   | 12             | 0.11           | 0.01           | 0.22              | 0.32             |
| 3     | 141  | 1.72                 | 0.92             | 0.81               | 0.11              | 88                   | 6              | 0.05           | 0.07           | 0.05              | 0.03             |
| 69    |      |                      |                  |                    |                   |                      |                |                |                |                   |                  |
| 1     | 160  | 1.80                 | 0.98             | 0.84               | 0.14              | 86                   | 5              | 0.04           | 0.06           | 0.08              | 0.07             |
| 2     | 160  | 1.78                 | 0.91             | 0.81               | 0.10              | 89                   | 6              | 0.05           | 0.02           | 0.11              | 0.13             |
| 3     | 158  | 1.84                 | 0.99             | 0.82               | 0.17              | 83                   | 1              | 0.01           | 0.06           | 0.07              | 0.02             |
| 77    |      |                      |                  |                    |                   |                      |                |                |                |                   |                  |
| 1     | 175  | 1.87                 | 1.03             | 0.89               | 0.15              | 86                   | 8              | 0.07           | 0.05           | 0.09              | 0.11             |
| 2     | 171  | 1.85                 | 1.00             | 0.86               | 0.14              | 86                   | 6              | 0.05           | 0.05           | 0.08              | 0.09             |
| 3     | 167  | 1.69                 | 0.94             | 0.83               | 0.11              | 88                   | 3              | 0.04           | 0.03           | 0.12              | 0.13             |
| 85    |      |                      |                  |                    |                   |                      |                |                |                |                   |                  |
| 1     | 178  | 1.94                 | 1.05             | 0.92               | 0.13              | 87                   | 7              | 0.07           | 0.04           | 0.17              | 0.20             |
| 2     | 176  | 1.70                 | 0.95             | 0.88               | 0.07              | 93                   | 6              | 0.05           | 0.06           | 0.07              | 0.06             |
| 3     | 173  | 1.79                 | 0.96             | 0.85               | 0.11              | 88                   | 6              | 0.02           | 0.08           | 0.08              | 0.03             |
| 94    |      |                      |                  |                    |                   |                      |                |                |                |                   |                  |
| 1     | 181  | 2.02                 | 1.05             | 0.96               | 0.09              | 91                   | 4              | 0.04           | 0.05           | 0.08              | 0.07             |
| 2     | 180  | 1.70                 | 1.01             | 0.80               | 0.21              | 79                   | 5              | 0.05           | 0.05           | 0.09              | 0.08             |
| 3     | 178  | 1.95                 | 1.09             | 0.89               | 0.20              | 82                   | 11             | 0.12           | 0.05           | 0.12              | 0.19             |
| 105   |      |                      |                  |                    |                   |                      |                |                |                |                   |                  |
| 1     | 192  | 1.87                 | 1.15             | 0.92               | 0.23              | 80                   | 4              | 0.04           | 0.08           | 0.15              | 0.11             |
| 2     | 191  | 1.79                 | 1.07             | 0.93               | 0.14              | 87                   | 8              | 0.07           | 0.10           | 0.08              | 0.05             |
| 3     | 186  | 1.85                 | 1.07             | 0.92               | 0.16              | 85                   | 7              | 0.08           | 0.07           | 0.06              | 0.07             |
| +105  |      |                      |                  |                    |                   |                      |                |                |                |                   |                  |
| 1     | 211  | 1.79                 | 1.14             | 0.99               | 0.15              | 87                   | 8              | 0.10           | 0.08           | 0.12              | 0.14             |
| 2     | 207  | 1.95                 | 1.30             | 1.17               | 0.13              | 90                   | 4              | 0.06           | 0.09           | 0.09              | 0.05             |
| 3     | 203  | 1.89                 | 1.09             | 1.01               | 0.08              | 93                   | 1              | 0.01           | 0.10           | 0.03              | -0.05            |
