# Supplementary material for: Survey of Barbell Trajectory and Kinematics of the Snatch Lift from the 2015 World and 2017 Pan-American Weightlifting Championships
Source: MDPI journal article supplement (doi:10.3390/sports8090118), 2020-08-25
Supplement: s1 [file s1]

**Table S1.** Distribution of barbell trajectory type of each athlete's heaviest successful snatch attempt in A sessions at 2017 Pan-American Weightlifting Championship.

| Category      | Type 1 | Type 2  | Type 3  | Type 4 |
|---------------|--------|---------|---------|--------|
| Women         |        |         |         |        |
| 48            | 2 (18) | 6 (55)  | 2 (18)  | 1 (9)  |
| 53            | -      | 6 (67)  | 3 (33)  | -      |
| 58            | 2 (22) | 2 (22)  | 5 (56)  | -      |
| 63            | 1 (11) | 3 (33)  | 5 (56)  | -      |
| 69            | 1 (11) | 1 (11)  | 6 (67)  | 1 (11) |
| 75            | -      | 2 (20)  | 8 (80)  | -      |
| 90            | -      | 1 (11)  | 8 (89)  | -      |
| +90           | 3 (33) | 1 (11)  | 4 (44)  | 1 (11) |
|               | 9 (12) | 22 (29) | 41 (55) | 3 (4)  |
| Men           |        |         |         |        |
| 56            | 1 (10) | 2 (20)  | 7 (70)  | -      |
| 62            | 1 (7)  | 11 (73) | 3 (20)  | -      |
| 69            | -      | 4 (29)  | 9 (64)  | 1 (7)  |
| 77            | -      | 4 (40)  | 6 (60)  | -      |
| 85            | 1 (13) | 2 (25)  | 5 (63)  | -      |
| 94            | 1 (10) | 1 (10)  | 8 (80)  | -      |
| 105           | -      | 1 (11)  | 8 (89)  | -      |
| +105          | -      | -       | 8 (89)  | 1 (11) |
|               | 4 (5)  | 25 (29) | 54 (64) | 2 (2)  |
| Continent     |        |         |         |        |
| North America | 9 (11) | 26 (32) | 46 (56) | 1 (1)  |
| South America | 4 (5)  | 21 (27) | 49 (63) | 4 (5)  |
| Grand Total   | 13 (8) | 47 (29) | 95 (59) | 5 (3)  |

Values are count (% relative frequency).
