# Supplementary material for: Survey of Barbell Trajectory and Kinematics of the Snatch Lift from the 2015 World and 2017 Pan-American Weightlifting Championships
Source: MDPI journal article supplement (doi:10.3390/sports8090118), 2020-08-25
Supplement: s1 [file s1]

**Table S10.** Results of omnibus 2x3 between-subjects ANOVAs for men.

|                      | Competition |      |       | Placement |      |       | Competition by placement |      |       |
|----------------------|-------------|------|-------|-----------|------|-------|--------------------------|------|-------|
|                      | $\eta^2$    | F    | p     | $\eta^2$  | F    | p     | $\eta^2$                 | F    | p     |
| V <sub>max</sub>     | 0.00026     | 0.01 | > 0.9 | 0.036     | 0.81 | 0.5   | 0.031                    | 0.69 | 0.5   |
| Y <sub>max</sub>     | 0.020       | 0.87 | 0.4   | 0.0059    | 0.13 | 0.9   | 0.021                    | 0.47 | 0.6   |
| Y <sub>catch</sub>   | 0.0097      | 0.45 | 0.5   | 0.010     | 0.24 | 0.8   | 0.086                    | 2.0  | 0.1   |
| Y <sub>drop</sub>    | 0.010       | 0.45 | 0.5   | 0.0046    | 0.10 | > 0.9 | 0.0079                   | 0.17 | 0.8   |
| Catch <sub>rel</sub> | 0.0017      | 0.08 | 0.8   | 0.0087    | 0.20 | 0.8   | 0.068                    | 1.5  | 0.2   |
| $\theta_1$           | 0.00029     | 0.01 | > 0.9 | 0.027     | 0.59 | 0.6   | 0.0049                   | 0.11 | > 0.9 |
| X <sub>1</sub>       | 0.015       | 0.66 | 0.4   | 0.042     | 0.94 | 0.4   | 0.0020                   | 0.04 | > 0.9 |
| X <sub>2</sub>       | 0.17        | 8.8  | 0.005 | 0.024     | 0.62 | 0.5   | 0.016                    | 0.41 | 0.7   |
| X <sub>loop</sub>    | 0.10        | 5.1  | 0.03  | 0.045     | 1.1  | 0.3   | 0.0090                   | 0.22 | 0.8   |
| X <sub>net</sub>     | 0.13        | 6.6  | 0.01  | 0.057     | 1.5  | 0.2   | 0.0060                   | 0.16 | 0.9   |
