# Supplementary material for: Survey of Barbell Trajectory and Kinematics of the Snatch Lift from the 2015 World and 2017 Pan-American Weightlifting Championships
Source: MDPI journal article supplement (doi:10.3390/sports8090118), 2020-08-25
Supplement: s1 [file s1]

**Table S5.** Load and kinematic variables for heaviest successful snatch attempt for top-three women in each weight category at 2015 World Weightlifting Championship.

| Place | Load | V <sub>max</sub>     | Y <sub>max</sub> | Y <sub>catch</sub> | Y <sub>drop</sub> | Catch <sub>rel</sub> | θ <sub>1</sub> | X <sub>1</sub> | X <sub>2</sub> | X <sub>loop</sub> | X <sub>net</sub> |
|-------|------|----------------------|------------------|--------------------|-------------------|----------------------|----------------|----------------|----------------|-------------------|------------------|
|       | (kg) | (m·s <sup>-1</sup> ) | (m)              | (m)                | (m)               | (%)                  | (°)            | (m)            | (m)            | (m)               | (m)              |
| 48    |      |                      |                  |                    |                   |                      |                |                |                |                   |                  |
| 1     | 88   | 1.80                 | 0.86             | 0.67               | 0.19              | 78                   | 9              | 0.07           | 0.03           | 0.13              | 0.18             |
| 2     | 85   | 1.93                 | 0.94             | 0.74               | 0.21              | 78                   | 0              | 0.00           | 0.06           | 0.06              | 0.00             |
| 3     | 85   | 1.73                 | 0.81             | 0.70               | 0.12              | 86                   | 5              | 0.04           | 0.03           | 0.12              | 0.12             |
| 53    |      |                      |                  |                    |                   |                      |                |                |                |                   |                  |
| 1     | 101  | 1.61                 | 0.82             | 0.66               | 0.16              | 80                   | 2              | 0.01           | 0.04           | 0.18              | 0.15             |
| 2     | 96   | 1.78                 | 0.88             | 0.74               | 0.15              | 83                   | 2              | 0.02           | 0.07           | 0.07              | 0.02             |
| 3     | 96   | 1.68                 | 0.89             | 0.70               | 0.20              | 78                   | 5              | 0.04           | 0.04           | 0.08              | 0.08             |
| 58    |      |                      |                  |                    |                   |                      |                |                |                |                   |                  |
| 1     | 112  | 1.94                 | 0.94             | 0.78               | 0.16              | 83                   | 8              | 0.07           | 0.04           | 0.09              | 0.12             |
| 2     | 108  | 1.71                 | 0.88             | 0.71               | 0.17              | 80                   | 11             | 0.11           | 0.00           | 0.18              | 0.29             |
| 3     | 106  | 2.10                 | 1.02             | 0.88               | 0.15              | 86                   | 7              | 0.06           | 0.06           | 0.13              | 0.13             |
| 63    |      |                      |                  |                    |                   |                      |                |                |                |                   |                  |
| 1     | 113  | 1.79                 | 0.92             | 0.75               | 0.17              | 82                   | 7              | 0.07           | 0.03           | 0.15              | 0.18             |
| 2     | 112  | 1.74                 | 0.99             | 0.82               | 0.17              | 83                   | 7              | 0.07           | 0.05           | 0.11              | 0.12             |
| 3     | 112  | 1.86                 | 0.94             | 0.81               | 0.14              | 86                   | 9              | 0.08           | 0.06           | 0.11              | 0.12             |
| 69    |      |                      |                  |                    |                   |                      |                |                |                |                   |                  |
| 1     | 120  | 1.79                 | 0.95             | 0.76               | 0.19              | 80                   | 6              | 0.06           | 0.03           | 0.20              | 0.22             |
| 2     | 116  | 1.69                 | 0.97             | 0.77               | 0.20              | 80                   | 8              | 0.08           | 0.04           | 0.09              | 0.14             |
| 3     | 116  | 1.94                 | 1.11             | 0.89               | 0.22              | 80                   | 5              | 0.05           | 0.07           | 0.07              | 0.05             |
| 75    |      |                      |                  |                    |                   |                      |                |                |                |                   |                  |
| 1     | 127  | 1.94                 | 0.99             | 0.86               | 0.13              | 87                   | 5              | 0.05           | 0.08           | 0.09              | 0.07             |
| 2     | 125  | 1.88                 | 0.98             | 0.82               | 0.16              | 84                   | 7              | 0.07           | 0.02           | 0.13              | 0.18             |
| 3*    | -    | -                    | -                | -                  | -                 | -                    | -              | -              | -              | -                 | -                |
| +75   |      |                      |                  |                    |                   |                      |                |                |                |                   |                  |
| 1     | 148  | 1.95                 | 1.07             | 0.96               | 0.10              | 90                   | 7              | 0.08           | 0.04           | 0.11              | 0.15             |
| 2     | 145  | 1.92                 | 1.06             | 0.94               | 0.12              | 88                   | 5              | 0.06           | 0.04           | 0.13              | 0.15             |
| 3     | 136  | 2.18                 | 1.14             | 1.02               | 0.12              | 90                   | 8              | 0.08           | 0.05           | 0.14              | 0.17             |

\* Lift not recorded due to hardware/software error.
