# Supplementary material for: Survey of Barbell Trajectory and Kinematics of the Snatch Lift from the 2015 World and 2017 Pan-American Weightlifting Championships
Source: MDPI journal article supplement (doi:10.3390/sports8090118), 2020-08-25
Supplement: s1 [file s1]

**Table S9.** Results of omnibus 2x3 between-subjects ANOVAs for women.

|                               | Competition |       |       | Placement |      |       | Competition by placement |       |       |
|-------------------------------|-------------|-------|-------|-----------|------|-------|--------------------------|-------|-------|
|                               | $\eta^2$    | F     | p     | $\eta^2$  | F    | p     | $\eta^2$                 | F     | p     |
| $V_{\max}$                    | 0.0017      | 0.06  | 0.8   | 0.092     | 1.8  | 0.2   | 0.020                    | 0.38  | 0.7   |
| $Y_{\max}$                    | 0.11        | 4.2   | 0.049 | 0.011     | 0.21 | 0.8   | 0.019                    | 0.37  | 0.7   |
| $Y_{\text{catch}}^{\ddagger}$ | -           | -     | 0.3   | -         | -    | 0.4   | -                        | -     | > 0.9 |
| $Y_{\text{drop}}$             | 0.0011      | 0.041 | 0.8   | 0.050     | 0.90 | 0.4   | 0.0036                   | 0.066 | > 0.9 |
| $\text{Catch}_{\text{rel}}$   | 0.024       | 0.89  | 0.4   | 0.048     | 0.88 | 0.4   | 0.0010                   | 0.018 | > 0.9 |
| $\theta_1^{\ddagger}$         | -           | -     | > 0.9 | -         | -    | 0.8   | -                        | -     | 0.9   |
| $X_1^{\ddagger}$              | -           | -     | > 0.9 | -         | -    | 0.8   | -                        | -     | 0.9   |
| $X_2$                         | 0.043       | 1.6   | 0.2   | 0.026     | 0.48 | > 0.9 | 0.006                    | 0.11  | 0.9   |
| $X_{\text{loop}}$             | 0.0059      | 0.23  | 0.6   | 0.025     | 0.48 | 0.7   | 0.090                    | 1.7   | 0.2   |
| $X_{\text{net}}$              | 0.0045      | 0.16  | 0.7   | 0.018     | 0.33 | 0.8   | 0.032                    | 0.58  | 0.6   |

$\ddagger$ ,  $\eta^2$  and F statistic were not included in robust ANOVA procedure output.
