# Supplementary material for: Survey of Barbell Trajectory and Kinematics of the Snatch Lift from the 2015 World and 2017 Pan-American Weightlifting Championships
Source: MDPI journal article supplement (doi:10.3390/sports8090118), 2020-08-25
Supplement: s1 [file s1]

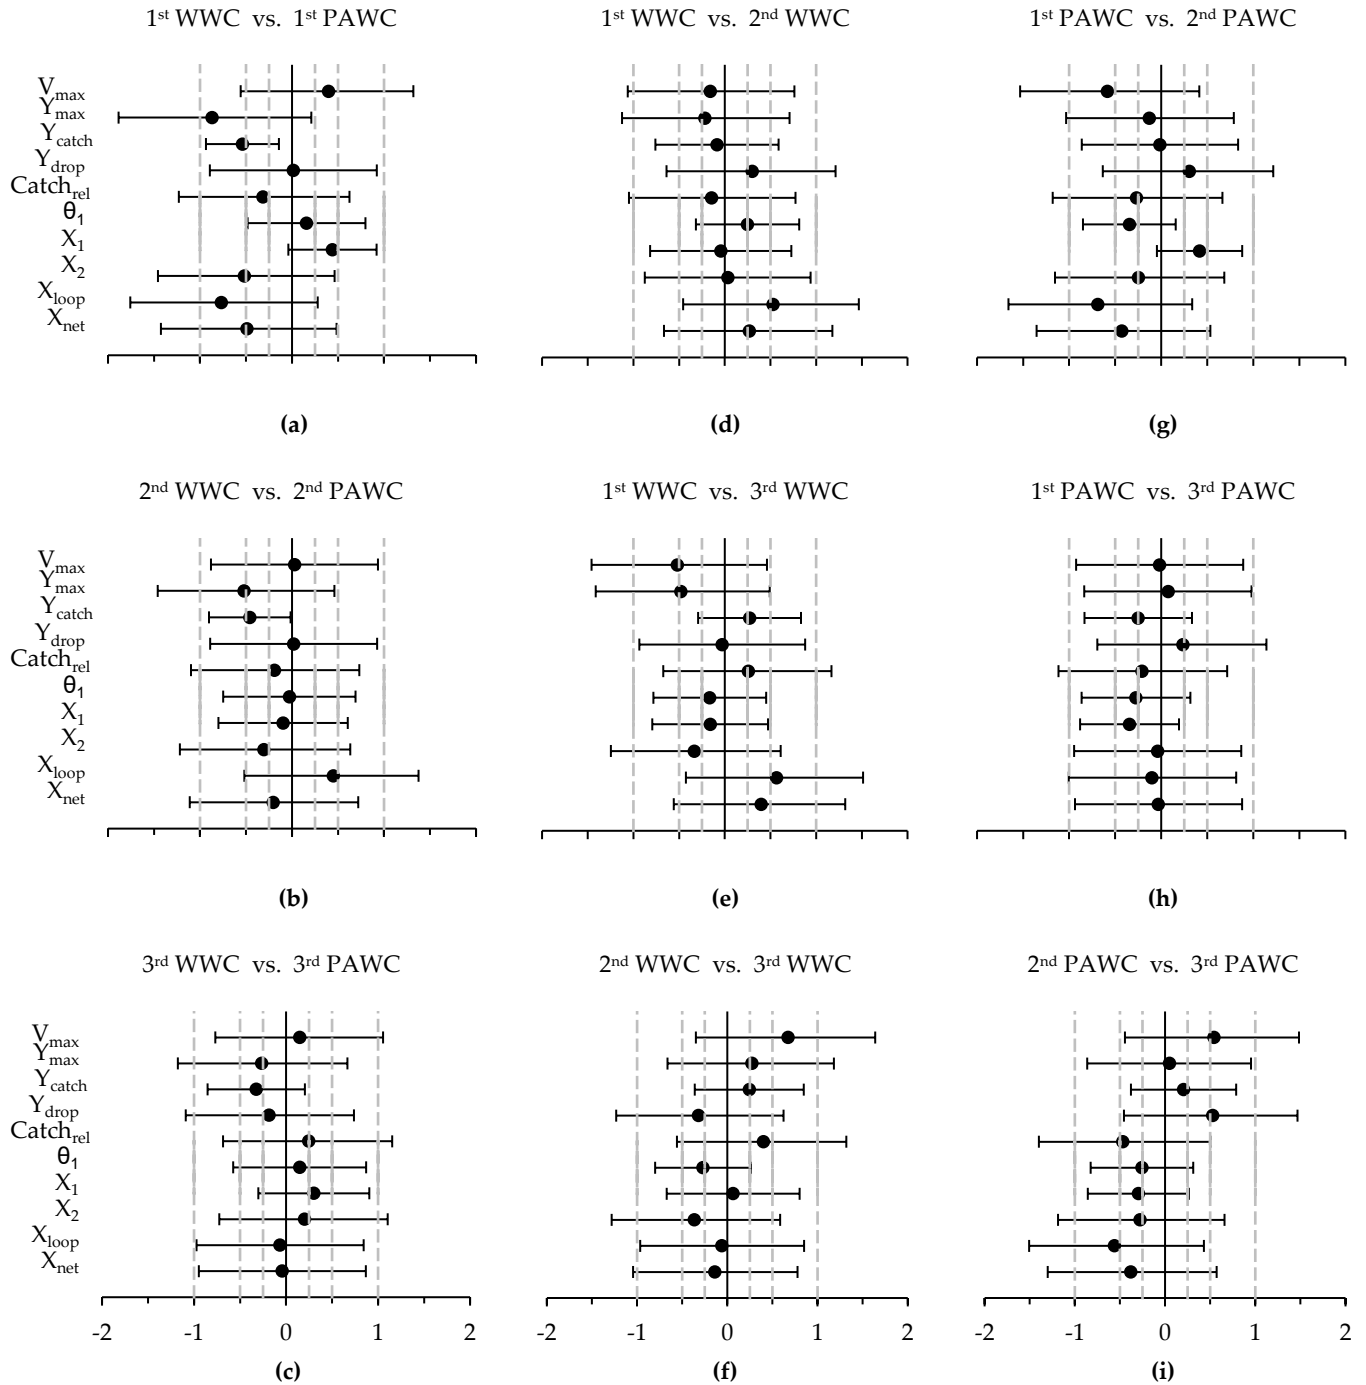

**Figure S1.** Cohen's d effect size with 95% confidence interval for main effects of competition (a-c) and placement (d-i) among top-three women: (a) 1<sup>st</sup> place at WWC vs. 1<sup>st</sup> place at PAWC; (b) 2<sup>nd</sup> place at WWC vs. 2<sup>nd</sup> place at PAWC; (c) 3<sup>rd</sup> place at WWC vs. 3<sup>rd</sup> place at PAWC; (d) 1<sup>st</sup> place at WWC vs. 2<sup>nd</sup> place at WWC; (e) 1<sup>st</sup> place at WWC vs. 3<sup>rd</sup> place at WWC; (f) 2<sup>nd</sup> place at WWC vs. 3<sup>rd</sup> place at WWC; (g) 1<sup>st</sup> place at PAWC vs. 2<sup>nd</sup> place at PAWC; (h) 1<sup>st</sup> place at PAWC vs. 3<sup>rd</sup> place at PAWC; (i) 2<sup>nd</sup> place at PAWC vs. 3<sup>rd</sup> place at PAWC; WWC, 2015 World Weightlifting Championship; PAWC, 2017 Pan-American Weightlifting Championship.
