# Supplementary material for: Survey of Barbell Trajectory and Kinematics of the Snatch Lift from the 2015 World and 2017 Pan-American Weightlifting Championships
Source: MDPI journal article supplement (doi:10.3390/sports8090118), 2020-08-25
Supplement: s1 [file s1]

**Table S3.** Distribution of barbell trajectory type of each top-three finisher's heaviest successful snatch attempt at 2017 Pan-American Weightlifting Championship.

| Category      | Type 1 | Type 2  | Type 3  | Type 4 |
|---------------|--------|---------|---------|--------|
| Women         |        |         |         |        |
| 48*           | 1      | 1       | -       | -      |
| 53            | -      | 2       | 1       | -      |
| 58            | -      | 2       | 1       | -      |
| 63            | 1      | 1       | 1       | -      |
| 69            | 1      | -       | 2       | -      |
| 75            | -      | 2       | 1       | -      |
| 90            | -      | -       | 3       | -      |
| +90           | 1      | 1       | 1       | -      |
|               | 4 (17) | 9 (39)  | 10 (43) | -      |
| Men           |        |         |         |        |
| 56            | -      | 2       | 1       | -      |
| 62            | -      | 2       | 1       | -      |
| 69            | -      | 2       | 1       | -      |
| 77            | -      | 2       | 1       | -      |
| 85            | 1      | -       | 2       | -      |
| 94            | 1      | 1       | 1       | -      |
| 105           | -      | -       | 3       | -      |
| +105          | -      | -       | 3       | -      |
|               | 2 (8)  | 9 (38)  | 13 (54) | -      |
| Continent     |        |         |         |        |
| North America | 4 (22) | 7 (39)  | 7 (39)  | -      |
| South America | 2 (7)  | 11 (38) | 16 (55) | -      |
| Grand Total   | 6 (13) | 18 (38) | 23 (49) | -      |

Values are count (% relative frequency); \* one lift not recorded due to hardware/software error.
