# Supplementary material for: Survey of Barbell Trajectory and Kinematics of the Snatch Lift from the 2015 World and 2017 Pan-American Weightlifting Championships
Source: MDPI journal article supplement (doi:10.3390/sports8090118), 2020-08-25
Supplement: s1 [file s1]

**Table S8.** Load and kinematic variables for heaviest successful snatch attempt for top-three men in each weight category at 2017 Pan-American Weightlifting Championship.

| Place | Load | $V_{\max}$           | $Y_{\max}$ | $Y_{\text{catch}}$ | $Y_{\text{drop}}$ | Catch <sub>rel</sub> | $\theta_1$ | $X_1$ | $X_2$ | $X_{\text{loop}}$ | $X_{\text{net}}$ |
|-------|------|----------------------|------------|--------------------|-------------------|----------------------|------------|-------|-------|-------------------|------------------|
|       | (kg) | (m·s <sup>-1</sup> ) | (m)        | (m)                | (m)               | (%)                  | (°)        | (m)   | (m)   | (m)               | (m)              |
| 56    |      |                      |            |                    |                   |                      |            |       |       |                   |                  |
| 1     | 119  | 1.61                 | 0.86       | 0.75               | 0.11              | 87                   | 6          | 0.05  | 0.03  | 0.12              | 0.14             |
| 2     | 118  | 1.70                 | 0.87       | 0.80               | 0.07              | 92                   | 6          | 0.05  | 0.00  | 0.14              | 0.19             |
| 3     | 108  | 1.85                 | 0.95       | 0.79               | 0.16              | 83                   | 6          | 0.06  | 0.01  | 0.17              | 0.22             |
| 62    |      |                      |            |                    |                   |                      |            |       |       |                   |                  |
| 1     | 125  | 1.71                 | 0.92       | 0.81               | 0.11              | 88                   | 8          | 0.07  | 0.02  | 0.13              | 0.18             |
| 2     | 124  | 1.71                 | 0.91       | 0.75               | 0.15              | 83                   | 11         | 0.10  | 0.03  | 0.06              | 0.13             |
| 3     | 123  | 1.85                 | 0.95       | 0.78               | 0.18              | 82                   | 4          | 0.03  | 0.05  | 0.04              | 0.03             |
| 69    |      |                      |            |                    |                   |                      |            |       |       |                   |                  |
| 1     | 145  | 1.93                 | 0.99       | 0.90               | 0.09              | 91                   | 10         | 0.11  | 0.01  | 0.16              | 0.25             |
| 2     | 143  | 1.65                 | 0.96       | 0.79               | 0.17              | 82                   | 5          | 0.05  | 0.04  | 0.13              | 0.14             |
| 3     | 137  | 1.71                 | 0.98       | 0.82               | 0.16              | 84                   | 5          | 0.06  | 0.03  | 0.12              | 0.15             |
| 77    |      |                      |            |                    |                   |                      |            |       |       |                   |                  |
| 1     | 162  | 2.00                 | 1.02       | 0.81               | 0.20              | 80                   | 8          | 0.08  | 0.01  | 0.15              | 0.22             |
| 2     | 152  | 1.69                 | 0.99       | 0.84               | 0.15              | 85                   | 10         | 0.11  | 0.02  | 0.14              | 0.23             |
| 3     | 151  | 1.77                 | 0.95       | 0.82               | 0.13              | 86                   | 8          | 0.09  | 0.01  | 0.23              | 0.31             |
| 85    |      |                      |            |                    |                   |                      |            |       |       |                   |                  |
| 1     | 160  | 1.78                 | 1.05       | 0.88               | 0.17              | 84                   | 7          | 0.08  | 0.01  | 0.19              | 0.25             |
| 2     | 159  | 1.77                 | 1.07       | 0.90               | 0.17              | 84                   | 3          | 0.03  | 0.03  | 0.17              | 0.17             |
| 3     | 158  | 2.00                 | 1.09       | 0.99               | 0.10              | 91                   | 4          | 0.04  | 0.06  | 0.08              | 0.06             |
| 94    |      |                      |            |                    |                   |                      |            |       |       |                   |                  |
| 1     | 169  | 1.93                 | 1.05       | 0.89               | 0.16              | 85                   | 8          | 0.08  | 0.03  | 0.11              | 0.16             |
| 2     | 166  | 1.86                 | 1.07       | 0.87               | 0.20              | 82                   | 4          | 0.04  | 0.02  | 0.18              | 0.20             |
| 3     | 166  | 2.01                 | 1.24       | 0.99               | 0.25              | 79                   | 6          | 0.06  | 0.07  | 0.05              | 0.03             |
| 105   |      |                      |            |                    |                   |                      |            |       |       |                   |                  |
| 1     | 182  | 1.78                 | 1.13       | 0.97               | 0.16              | 86                   | 2          | 0.02  | 0.05  | 0.10              | 0.07             |
| 2     | 175  | 1.93                 | 1.12       | 0.98               | 0.13              | 88                   | 4          | 0.05  | 0.09  | 0.06              | 0.02             |
| 3     | 167  | 1.63                 | 1.15       | 0.94               | 0.21              | 82                   | 2          | 0.02  | 0.04  | 0.08              | 0.07             |
| +105  |      |                      |            |                    |                   |                      |            |       |       |                   |                  |
| 1     | 178  | 2.08                 | 1.21       | 1.15               | 0.06              | 95                   | 2          | 0.02  | 0.07  | 0.14              | 0.09             |
| 2     | 176  | 1.78                 | 1.16       | 0.99               | 0.16              | 86                   | 8          | 0.09  | 0.06  | 0.07              | 0.10             |
| 3     | 175  | 1.86                 | 1.13       | 0.98               | 0.15              | 87                   | 5          | 0.05  | 0.10  | 0.09              | 0.04             |
